# Supplementary material for: Induction of Wnt-Inducible Signaling Protein-1 Correlates with Invasive Breast Cancer Oncogenesis and Reduced Type 1 Cell-Mediated Cytotoxic Immunity: A Retrospective Study
Source: PLoS Comput Biol. 2014 Jan 9;10(1):e1003409. doi: 10.1371/journal.pcbi.1003409 (PMC3890420; doi:10.1371/journal.pcbi.1003409)
Supplement: Table S1 — Results for Cox proportional hazards regression model. The Cox model: (Survival∼p(Th1 T cell)+Molecular Pathology). The results suggest that the posterior estimate of a Th1 immune cell polarization gene expression signature (i.e., p(Th1 T cell)) is a predictor of overall survival independent of the molecular pathology. We also found that the other T helper cell polarization states (i.e., p(Th2 T cell), p(Th17 T cell), and p(iTreg T cell)) were not predictive. (PDF) [file pcbi.1003409.s009.pdf]

### Table S1 - Results for Cox proportional hazards regression model.

The Cox model: (Survival  $\sim$  p(Th1 T cell) + Molecular Pathology). The results suggest that the posterior estimate of a Th1 immune cell polarization gene expression signature (i.e., p(Th1 T cell)) is a predictor of overall survival independent of the molecular pathology. We also found that the other T helper cell polarization states (i.e., p(Th2 T cell), p(Th17 T cell), and p(iTreg T cell)) were not predictive.

| Survival<br>(Years) | p(Th1 T cell) |              |                 | Molecular Pathology |              |                |
|---------------------|---------------|--------------|-----------------|---------------------|--------------|----------------|
|                     | p-value       | Hazard ratio | 95% C.I.        | p-value             | Hazard ratio | 95% C.I.       |
| 1                   | 0.001         | $< 1e-15$    | $1e-61 - 1e-15$ | 0.108               | 5.41         | $0.69 - 42.26$ |
| 3                   | 0.035         | 0.115        | $0.015 - 0.859$ | 0.019               | 2.064        | $1.128 - 3.78$ |
| 5                   | 0.062         | 0.210        | $0.041 - 1.083$ | 0.020               | 1.971        | $1.115 - 3.49$ |
| 6                   | 0.034         | 0.180        | $0.037 - 0.875$ | 0.013               | 1.938        | $1.152 - 3.26$ |

Molecular Pathology defined as TN = 3, HER2+ = 2, ER+/PR+ = 1.
